1 **Title page**

2 **Authors**

3 Muhammed Rezwan Kabir<sup>1</sup> · Heather M. Nonhebel<sup>1\*</sup> · David Backhouse<sup>2</sup> · Gal Winter<sup>1</sup>

4 **Title**

5 Expression of *TaTAR2.3-1B*, *TaYUC9-1* and *TaYUC10* correlates with auxin and starch  
6 content of developing wheat grains

7 **Affiliations**

8 <sup>1</sup>School of Science and Technology, University of New England, Armidale, New South  
9 Wales 2351, Australia

10 <sup>2</sup>School of Environmental and Rural Science, University of New England, Armidale, New  
11 South Wales 2351, Australia

12 Corresponding author: Heather. M. Nonhebel, [hnonheb2@une.edu.au](mailto:hnonheb2@une.edu.au)

13 **ORCID IDs**

14 MRK 0000-0002-8115-7725, DB 0000-0003-0663-6002, GW 0000-0003-3789-395X, HMN  
15 0000-0001-9055-3095

16 **Abstract**

17 The role of auxin in developing grains of wheat (*Triticum aestivum*) is contentious with  
18 contradictory reports indicating either positive or negative effects of IAA (indole-3-acetic  
19 acid) on grain size. In addition, the contributions to the IAA pool from de novo synthesis via  
20 tryptophan, and from hydrolysis of IAA-glucose are unclear. Here we describe the first  
21 comprehensive study of tryptophan aminotransferase and indole-3-pyruvate mono-oxygenase  
22 expression during wheat grain development from 5 to 20 days after anthesis. A comparison of  
23 expression data with measurements of endogenous IAA via combined liquid  
24 chromatography-tandem mass spectrometry with heavy isotope labelled internal standards  
25 indicates that *TaTAR2.3-1B*, *TaYUC9-A1*, *TaYUC9-B*, *TaYUC9-D1*, *TaYUC10-A* and

26 TaYUC10-D are primarily responsible for IAA production in developing grains.  
27 Furthermore, we show that IAA synthesis is controlled by genes expressed specifically in  
28 developing wheat grains as has already been reported in rice (*Oryza sativa*) and maize (*Zea*  
29 *mays*). Our results cast doubt on the proposed role of *THOUSAND-GRAIN WEIGHT* gene,  
30 *TaTGW6*, in promoting larger grain size via negative effects on grain IAA content. The work  
31 on *TaTGW6* has overlooked the contribution of the dominant IAA biosynthesis pathway.  
32 Although IAA synthesis occurs primarily in the endosperm of wheat grains, we show that the  
33 *TaYUC9-1* group is also strongly expressed in the embryo. Within the endosperm, *TaYUC9-1*  
34 expression is highest in aleurone and transfer cells, supporting data from other cereals  
35 suggesting that IAA has a key role in differentiation of these tissues.

### 36 **Keywords**

37 Auxin, grain fill, TaTAR2, TaYUC, TaTGW6, TaTGW-7A

### 38 **Declarations**

### 39 **Funding**

40 The research was supported by a Research Training Program (RTP) scholarship provided to  
41 Muhammed Rezwan Kabir by the Australian Government.

### 42 **Conflicts of interest**

43 The authors declare that they have no conflict of interests.

### 44 **Availability of data and material**

45 Not applicable

### 46 **Code availability**

47 Not applicable

### 48 **Author contribution statement**

49 MRK and HMN conceived and designed the research. MRK performed all the experiments.  
50 DB contributed to growing wheat plants and preparation of manuscript. GW helped in

51 analysing gene expression data. MRK and HMN wrote the manuscript. All authors read and  
52 approved the manuscript.

### 53 **Key message**

54 Expression of *TaTAR2.3*, *TaYUC9-1* and *TaYUC10* coincides with increasing IAA content,  
55 grain weight and starch content from 10-15 DAA, highlighting the importance of the  
56 TAR/YUCCA pathway in wheat grain filling.

### 57 **Acknowledgements**

58 The authors are grateful to Kirsten Drew for the analysis of IAA. The authors also  
59 acknowledge the Australian Government for providing a Research Training Program (RTP)  
60 PhD scholarship to Muhammed Rezwan Kabir.

## 61 Introduction

62 Global wheat (*Triticum aestivum*) production has reached 760.1 million tonnes (FAOSTAT  
63 2020); however, a substantial increase in yield from the existing land area is essential to meet  
64 the needs of the rapidly increasing world population. The International Wheat Yield  
65 Consortium (WYC) has introduced a strategy to improve yield potential that could accelerate  
66 breeding of high yielding wheat varieties (Foulkes et al. 2011). This has identified grain  
67 number and grain weight as two key yield-determining factors. The plant hormone auxin or  
68 IAA (indole-3-acetic acid) appears to play a major role in both of these aspects of grain  
69 development.

70 In particular, inactive alleles of two genes *TaTGW6* and *TaTGW-7A* are reported to  
71 improve grain size in wheat via negative effects on the grain IAA content (Hu et al. 2016a;  
72 Hu et al. 2016b). *TaTGW6* is homologous to the rice gene *TGW6*, reported by Ishimaru et al.  
73 (2013) to encode an IAA-glucose hydrolase. Although the work on wheat did not characterise  
74 the gene product of *TaTGW6*, Hu et al. (2016a) reported that an inactive allele, *TaTGW6-c*, as  
75 well as a mutant allele, *TaTGW6-b*, were associated with lower IAA content of grains at 20  
76 and 30 days after anthesis (DAA) as well as higher grain weight. *TaTGW-7A* is reported as an  
77 indole-3-glycerol phosphate synthase (IGPS) like gene (Hu et al. 2016b). Again, there was no  
78 characterisation of the gene product. However, the authors reported a similar lower IAA  
79 content in grains with the inactive *TaTGW-7Aa* allele as that found in *TaTGW6-b* and  
80 *TaTGW6-c* plants.

81 In contrast, the majority of relevant publications report a positive involvement of IAA  
82 on grain size in a number of cereals. For example, the shrunken grain phenotype of defective  
83 endosperm and defective kernel mutants of maize, *de18* and *dek18* appears to result from low  
84 levels of IAA in the developing grains caused by mutations affecting *ZmYUC1* expression  
85 (Bernardi et al. 2012; Bernardi et al. 2016). In rice, a mutation in the IAA biosynthesis gene  
86 *OsTAR2/FIB* is associated with the *tillering and small grain 1 (tsg1)* phenotype (Guo et al.  
87 2019). Finally, in wheat, Shao et al. (2017) showed that overexpression of *TaTAR2.1-3A*  
88 increases IAA accumulation in grains and enhances plant height, spike number, biomass and  
89 grain yield. Thus the claim that *TaTGW6* and *TaTGW-7A* have a positive effect on grain size  
90 via a reduction in IAA content requires careful scrutiny.

91           In plants, including developing seeds, IAA is produced primarily from tryptophan via  
92 the actions of tryptophan aminotransferase of *Arabidopsis1* (*TAA1*) and its related proteins  
93 (*TAR*), and indole-3-pyruvate monooxygenase known as *YUCCA* (Mashiguchi et al. 2011;  
94 Won et al. 2011). In assuming that inactivation of a glucose hydrolase gene can lead to a  
95 large reduction in grain IAA content, the *TGW6* work has overlooked this major source of  
96 IAA. On the other hand, the same authors suggest that *TaTGW-7A* affects grain IAA content  
97 via its effects on tryptophan production. The *TAR/YUCCA* pathway is known to occur in  
98 wheat grains from three studies. Shao et al. (2017) reported a comprehensive study of the  
99 *TAR* gene family based on an early version of the wheat genome and showed that of all *TAR*  
100 genes, *TaTAR2.3* was maximally expressed in grains. However, they did not investigate the  
101 timing of *TaTAR2.3* expression during grain fill or present any data on the IAA content of  
102 grains. Li et al. (2014) showed *TaYUC10.3* is highly expressed in developing wheat grains,  
103 with expression increasing throughout the grain-fill period but did not investigate any other  
104 *YUCCA* genes from wheat or relate gene expression to the IAA content. Finally, Tuan et al.  
105 (2019) described expression changes in “*TaTAR2*” (actually *TaTAR2.3-ID*) and “*TaYUC11*”  
106 from microarray data during seed maturation (20-50 DAA) and also measured the IAA  
107 content of endosperm and embryo tissue. However, there have been no comprehensive  
108 studies of the *YUCCA* gene family in wheat, their expression profile during grain  
109 development or correlation with the grain IAA content.

110           The aim of our work was therefore to evaluate the role of the *TAR/YUCCA* pathway  
111 in the regulation of IAA content during grain fill in wheat. The study comprised the first  
112 comprehensive phylogenetic and expression analysis of all *TAR* and *YUCCA* genes in wheat.  
113 The expression profile of major IAA biosynthesis genes during early grain development was  
114 compared with changes in the grain IAA content measured by the most accurate and specific  
115 method available, as well as with changes in the starch content of grains. To inform future  
116 studies on the specific signalling role(s) of IAA in wheat grains, we also investigated the  
117 location of IAA production via dissection of grains into embryo and endosperm fractions as  
118 well as by mining information from published RNA-sequencing (RNA-seq) studies.

## 119 **Materials and methods**

### 120 **Data mining and Bioinformatic analysis**

121 Protein sequences of all *TAR* and *YUCCA* genes from wheat (*Triticum aestivum*) (IWGSC  
122 RefSeq v1.1), rice (*Oryza sativa*), brachypodium (*Brachypodium distachyon*) and barley  
123 (*Hordeum vulgare*) were downloaded from EnsemblPlants 47 (Kersey et al. 2015) following  
124 BlastP searches using the query sequences OsTAR2, OsYUC1 and OsYUC9 from rice.  
125 Arabidopsis TAA1 and TAR sequences were downloaded from The Arabidopsis Information  
126 Resource (TAIR) (Rhee et al. 2003). Phylogenetic analyses of the protein sequences were  
127 carried out in MEGA7.0.26 (Kumar et al. 2016) using the Maximum Likelihood method  
128 (Jones et al. 1992). Multiple sequence alignments (MSA) were performed by MUSCLE  
129 (Edgar 2004). Bootstrap confidence levels were obtained using 500 replicates (Felsenstein  
130 1985). Evolutionary distances were computed using Poisson correction method (Zuckerkanndl  
131 and Pauling 1965). RNA-seq data available in expVIP (<http://www.wheat-expression.com>)  
132 (Borrill et al. 2016; Ramírez-González et al. 2018) were used for global evaluation of gene  
133 expression, as well as for investigating gene expression in dissected aleurone and transfer cell  
134 tissues.

### 135 **Plant materials**

136 Wheat plants (Chinese Spring) were grown in 20 cm × 20 cm pots under natural light at  
137 23/14°C (day/night temperatures) in the glasshouse at the University of New England,  
138 Armidale, NSW. Pots were fertilized once a week with Thrive® (Yates, 1 g/L) from the  
139 initiation of tillering stage. Spikes were tagged when the first spikelet reached anthesis. Grain  
140 samples (70–90 mg) were harvested at the same time (4:00 to 5:00 pm) each day 5, 10, 15  
141 and 20 DAA, then snap-frozen in liquid nitrogen and stored at –80°C. Some 15 DAA grains  
142 were manually dissected into embryos and endosperms. Grain samples from individual spikes  
143 were kept separate and all analyses were done on at least three independent biological  
144 replicates harvested from different plants, on different days.

### 145 **RNA extraction and quantitative analysis**

146 Wheat grain samples, harvested and stored as described above, were ground in liquid  
147 nitrogen and total RNA was extracted using Trizol (Invitrogen). RNA concentration and

148 260/280 ratio were determined using a NanoDrop ND-8000 Spectrophotometer (Thermo  
149 Scientific). RNA samples with  $A_{260/280}$  of 1.8–2.0 were used for further analysis. The RNA  
150 quality was checked by agarose gel electrophoresis for two clear bands of 18S and 28S  
151 rRNAs (Nolan et al. 2006). Primers specific for each group of three paralogues on the A, B  
152 and D genomes were designed with melting points in the range of 58–60°C and product sizes  
153 between 108–251 bp (Supplementary Table S1). Initial amplification was carried out using a  
154 One-Step RT-PCR Kit (QIAGEN) in a BIO-RAD T100 Thermal Cycler, with gel analysis to  
155 confirm a single product of the expected size. cDNAs were prepared using the SensiFAST  
156 cDNA Synthesis Kit (Bioline). Quantitative real-time PCR reactions using cDNA samples as  
157 template were carried out using a SensiFAST SYBR No-ROX Kit (Bioline) in a CFX96  
158 Touch (BIO-RAD) machine following manufacturer’s instructions. Negative control  
159 reactions without reverse transcriptase as well as reactions with no template were included.  
160 Three biological and three technical replicates were carried out for each primer set. The qRT-  
161 PCR program included 40 cycles of 95°C 3 min, 95°C 10 s, 55°C 30 s and 72°C 5 s.  
162 Expression was calculated relative to two reference genes, translation elongation factor EF-I  
163 alpha Ta53964 (Paolacci et al. 2009) and a cyclin-like protein Ta27922 (Wu et al. 2015).  
164 Expression data presented are the average and standard error of biological replicates.  
165 Amplified products were sent to the Australian Genome Research Facility for sequencing to  
166 confirm identity following the use of the Wizard SV Gel and PCR Clean-Up System  
167 (Promega).

## 168 **IAA extraction and analysis**

169 Wheat grain samples (70–90 mg) were ground in liquid nitrogen; 200  $\mu$ L of 65% isopropanol  
170 /35% 0.2 M pH 7.0 imidazole buffer (Chen et al. 1988) was added with [ $^{13}\text{C}_6$ ] IAA internal  
171 standard (Cambridge Isotope Laboratories Inc.), and samples were extracted on ice for 1 h.  
172 Amounts of standards added varied with the age of samples to ensure that the concentration  
173 of standards was similar to that of endogenous IAA; 78 ng of [ $^{13}\text{C}_6$ ] IAA was added to 10, 15  
174 and 20 DAA samples; 16 ng of [ $^{13}\text{C}_6$ ] IAA was added to 5 DAA samples. Blank samples  
175 without plant tissue were taken through the entire extraction and analysis protocol to ensure  
176 that no contamination from the unlabelled IAA in the laboratory occurred.

177           Following extraction, samples were diluted with 2 mL deionized water, centrifuged  
178 and the supernatant transferred to a glass tube. Sample clean-up followed the solid-phase  
179 extraction (SPE) protocol of (Barkawi et al. 2008) with minor modifications. Samples  
180 prepared as above were added to discovery® DSC-NH<sub>2</sub> SPE 50 mg/mL tubes (Supelco) that  
181 had been prewashed sequentially with 500 µL hexane, 500 µL acetonitrile, 500 µL water, 500  
182 µL 0.2 M pH 7.0 imidazole buffer and 4.5 mL deionized water. After loading each sample,  
183 SPE columns were washed sequentially with 500 µL each of water, hexane, ethyl acetate,  
184 acetonitrile, methanol and 600 µL 0.25% phosphoric acid. The IAA was eluted in 1.8 mL  
185 0.25% phosphoric acid and the pH of the eluate was adjusted to 3.0–3.5 with 150 µL 0.1 M,  
186 pH 6.0 succinate buffer. This fraction was added to Strata-X SPE (8B-S100-UBJ 60 mg/3  
187 mL; Phenomenex) that had been prewashed with 1 mL hexane, 1 mL methanol and 2 mL  
188 water. Samples loaded on the SPE columns were washed with 3×1 mL water and 100 µL  
189 acetonitrile before eluting the IAA in 1 mL acetonitrile.

190           Samples from SPE clean-up were stored at –20°C. Immediately prior to analysis, they  
191 were reduced to dryness under a stream of N<sub>2</sub> and redissolved in 20 µL acetonitrile and 80 µL  
192 0.01 M aqueous acetic acid. The analysis of <sup>12</sup>C:<sup>13</sup>C IAA was conducted using a triple  
193 quadrupole Liquid Chromatograph Mass Spectrometer (LCMS)-8050, (Shimadzu) with  
194 XBridge™ C18 3.5 µm, 2.1×50 mm column (Phenomenex). The chromatography solvent  
195 was 20% acetonitrile: 80% 0.01 M acetic acid at a flow rate of 0.2 mL/min. The nebulizing,  
196 heating and drying gas flow were 3 L/min, 10 L/min and 10 L/min, respectively. Interface  
197 temperature was 300°C, DL was 250°C and the heat block temperature was 400°C. The  
198 interface used a capillary voltage of 4 kV. The mass spectrometer was operated in multiple-  
199 reaction-monitoring mode (collision energy, 14.0 eV), transitions from *m/z* 174.10 to 130.10  
200 for [<sup>12</sup>C<sub>6</sub>] and *m/z* 180.20 to 136.15 for [<sup>13</sup>C<sub>6</sub>] were monitored. A series of standard mixtures  
201 of [<sup>13</sup>C<sub>6</sub>] and unlabelled IAA in different ratios 10:1 to 1:10 were also assayed to confirm  
202 accuracy of quantitative analysis. Data were obtained from the average of two technical  
203 replicates first, then the average and the standard error of three biological replicates from  
204 each developmental stage.



## 205 **Starch assay**

206 Frozen wheat grain samples were freeze-dried then placed in microfuge tubes with stainless  
207 steel beads and ground using a TissueLyser II (QIAGEN) for 3 min at a frequency of 30/s.  
208 Starch extraction and analysis followed the methods of Zhao et al. (2010). After the  
209 extraction of soluble sugars in 80% ethanol, the remaining starch pellet was hydrolysed  
210 sequentially with amylase (Sigma A3403) and amyloglucosidase (Sigma A7095). The  
211 resulting glucose was assayed using glucose HK assay reagent (Sigma G3293) in microtitre  
212 plates using a SPECTROstar<sup>Nano</sup> (BMG LABTECH) at 340 nm. Three biological replicates  
213 were extracted for each time period; three technical replicates were assayed for each sample.

## 214 **Results**

### 215 **Wheat has orthologues of OsTAR1 and OsTAR2 as well as a wheat-specific** 216 **branch of TaTAR2**

217 A BlastP search of the wheat proteome found 15 co-orthologues of Arabidopsis TAR2. Their  
218 encoding genes are listed in Table 1, with IWGSC RefSeq v1.1 gene IDs. Twelve of these  
219 were previously named by Shao et al. (2017) as *TaTAR2.1* to *TaTAR2.5* with suffixes  
220 indicating chromosome/genome. We followed a similar format, naming the three additional  
221 genes as group *TaTAR2.6*. Two of these are tandem repeats designated as *TaTAR2.6-1Ba* and  
222 *TaTAR2.6-1Bb* whereas the chromosomal location of the third *TaTAR2.6-U* is currently  
223 unknown. *TaTAR2.1*, *TaTAR2.2* and *TaTAR2.3* have one copy in each of the A, B and D  
224 genomes. On the other hand, *TaTAR2.4*, *TaTAR2.5* and *TaTAR2.6* do not have a copy on the  
225 D genome.

226 The protein phylogenetic tree in Fig. 1 compares wheat TAR sequences with rice and  
227 Arabidopsis enzymes that have demonstrated tryptophan aminotransferase activity. The tree  
228 also has a branch containing three TaTAR3 proteins orthologous to OsTAR3. These are  
229 usually designated as alliinases, and unlikely to be involved in IAA production. Three  
230 proteins designated as TaTAR2.3-1A/B/D are co-orthologues of OsTAR1/OsFBL in rice.  
231 Barley and Brachypodium also have at least one protein in this clade. A second clade with a  
232 high bootstrap value contains OsTAR2/OsFIB as well as six closely related wheat proteins,  
233 TaTAR2.1-3A/B/D and TaTAR2.2-1A/B/D and one protein each from barley and

234 Brachypodium. The remaining six wheat proteins have been placed in the same clade as  
235 OsTAR1 and TaTAR2.3 but with a low bootstrap value indicating ambiguity. This branch  
236 has no proteins from the other cereals.

### 237 **Expression of *TaTAR2.3-1B* in grains increases from 5 to 15 DAA**

238 We investigated the expression of all *TaTAR2* genes at four times during wheat grain fill, 5,  
239 10, 15 and 20 DAA. Due to the large number and high similarity of genes from each genome,  
240 six primer sets were designed, each to amplify all genes from sets *TaTAR2.1* to *TaTAR2.6* as  
241 shown in Supplementary Table S1. Initial RT-PCR analysis showed efficient amplification of  
242 a single band of the expected size for the *TaTAR2.3* group only. In contrast, *TaTAR2.1*,  
243 *TaTAR2.2* and *TaTAR2.5* groups showed very low amplification and there was no  
244 amplification of *TaTAR2.4* and *TaTAR2.6* groups. We therefore investigated the expression  
245 of *TaTAR2.3* by qRT-PCR. A large (44-fold) up-regulation occurred between 5 and 15 DAA  
246 after which expression appeared to plateau (Fig. 2a). The location of *TaTAR2.3* expression  
247 within grains at 15 DAA was also investigated by dissection of the grains into embryo and  
248 endosperm components (Fig. 2b). This revealed endosperm-specific gene activity.  
249 Sequencing of the PCR product from 15 DAA samples indicated the B genome copy of  
250 *TaTAR2.3* was the primary gene expressed.

251 Additional information on *TaTAR2* expression, from RNA-seq data in the expVIP  
252 database is shown in Fig. 3. This confirmed *TaTAR2.3-1B* is the most highly expressed gene  
253 in wheat grains, with maximum up-regulation between 10 and 20 DAA. The D genome copy  
254 of *TaTAR2.3* was also expressed but at much lower levels. Results from manually dissected  
255 tissue layers (Pfeifer et al. 2014), indicated that expression occurred across all parts of the  
256 endosperm including starchy endosperm, aleurone layer and transfer cells. In addition,  
257 *TaTAR2.5-1B*, *TaTAR2.2-1A* and *TaTAR2.2-1D* are expressed very early in grain  
258 development at 2 DAA, followed by a decrease in expression.

### 259 **Comprehensive phylogenetic analysis of YUCCA proteins and systematic** 260 **naming of wheat YUCCAs**

261 The wheat genome contains 35 members of the YUCCA gene family. These are listed in  
262 Table 2 along with their chromosomal location and IWGSC RefSeq v1.1 gene IDs. As there

263 has been no previous comprehensive study of the YUCCA gene family in wheat, we have  
264 named these systematically according to their homology with rice *YUCCA* genes following  
265 naming structure in the Wheat Gene Catalogue (<https://wheat.pw.usda.gov/GG3/wgc>). We  
266 suggest renaming the TaYUC10 group, previously designated as *TaYUC10.1*, *TaYUC10.2*  
267 and *TaYUC10.3* by Li et al. (2014) as *TaYUC10-B1*, *TaYUC10-A* and *TaYUC10-D*,  
268 respectively. In addition, Tuan et al. (2019) referred to TraesCS5B02G216000 as *TaYUC11*  
269 by homology to Arabidopsis *YUC11*. We suggest it is more logical to refer to this gene as  
270 *TaYUC9-B* as it is orthologous to *OsYUC9*, and there are other wheat genes orthologous to  
271 *OsYUC11*.

272 Figure 4 shows the phylogenetic relationships between wheat and rice YUCCA  
273 proteins. The tree comprises two major clades; the larger clade I contains OsYUC1-8 as well  
274 as orthologous wheat proteins. OsYUC2 is missing from the tree as *OsYUC2* appears not to  
275 be expressed in rice and it also has no wheat orthologues. Most of the TaYUC sequences in  
276 clade I are encoded by each of the A, B and D genomes. However, TaYUC-6 is found in the  
277 A and B genomes only. The smaller clade II contains OsYUC9, OsYUC11, OsYUC12 and  
278 OsYUC14 (*OsYUC10* and *OsYUC13* being probable pseudogenes) as well as 12 wheat  
279 proteins. Wheat has five proteins in the OsYUC9 branch. Three of these, TaYUC9-A1,  
280 TaYUC9-B and TaYUC9-D1 are co-orthologous with OsYUC9 and we refer to these as the  
281 TaYUC9-1 group. Two less similar proteins in this branch have been named as TaYUC9-A2  
282 and TaYUC9-D2. Wheat also has three co-orthologues of OsYUC11; TaYUC11-A1,  
283 TaYUC11-D and TaYUC11-A2. In addition, there is a group of four proteins designated as  
284 TaYUC10, three of which were previously reported by Li et al. (2014). TaYUC10 proteins  
285 have highest amino acid similarity to OsYUC11 but are also similar to OsYUC12/14; this  
286 agrees with their positioning in the tree. Due to their importance in grain development, the  
287 relationship between proteins in clade II was further investigated with the addition of  
288 homologous proteins from Brachypodium and barley (Supplementary Figure S1). This  
289 revealed that both species have at least one orthologue of OsYUC9 and OsYUC11 but the  
290 OsYUC12/14 branch does not have orthologues in wheat, barley or Brachypodium, all  
291 members of the Pooideae. Instead, these cereals have a separate branch including TaYUC10,  
292 which has undergone considerable gene duplication within each species, particularly barley.

293 **Expression of *TaYUC9-1* and *TaYUC10* in developing grains increases from 5**  
294 **to 15 DAA**

295 Figure 3 summarises information from RNA-seq data (expVIP database), on the expression  
296 throughout the plant as well as during grain development of *TaYUC* genes. None of the  
297 *TaYUC* genes in clade I has significant expression in wheat grains. Some expression occurs  
298 in leaves and the spike at anthesis. However, the greatest expression of genes in this clade is  
299 in the roots, where *TaYUC3*, *TaYUC6* and *TaYUC7* are the most highly expressed gene  
300 groups, with expression of genes from all three genomes. Conversely, a number of clade II  
301 genes show very high expression in grains. Greatest up-regulation is found between 10 and  
302 20 DAA, with *TaYUC9-A1*, *TaYUC9-B*, *TaYUC9-D1*, *TaYUC10-A* and *TaYUC10-D* being  
303 the genes with highest activity. A different gene, *TaYUC9-D2* has high expression at 2 DAA  
304 in grains, after which it is down-regulated, with no observable expression at 10 DAA.  
305 Expression of the *TaYUC10* group is restricted to the grains. However, the *TaYUC9-1* group  
306 is also active in vegetative tissue, particularly the stem and roots. *TaYUC9-D2* is the gene  
307 with highest activity in leaves and spike.

308 As gene expression in the developing grains was the primary focus of this study, we  
309 carried out a quantitative expression analysis of *TaYUC* genes in clade II from 5 to 20 DAA.  
310 Primers were designed to amplify genes from all three genomes as shown in Supplementary  
311 Table S1. Initial RT-PCR screening demonstrated successful amplification of the *TaYUC9-1*  
312 and *TaYUC10* groups, producing a single product of the correct size. On the other hand, no  
313 product was obtained for *TaYUC9-2* and *TaYUC11* confirming that these genes have very  
314 little or no expression in grains from 5 to 20 DAA. Investigation by qRT-PCR showed strong  
315 up-regulation of the *TaYUC9-1* and *TaYUC10* groups during grain development, as shown in  
316 Fig. 2a. The *TaYUC10* genes were up-regulated earlier than the *TaYUC9-1* group, reaching  
317 maximum expression at 10 DAA and decreasing activity at 20 DAA. In contrast, the  
318 expression of *TaYUC9-1* was primarily up-regulated between 10 and 15 DAA, and showed  
319 no reduction in expression at 20 DAA. The location of expression of *TaYUC9-1* and  
320 *TaYUC10* groups was also investigated following dissection of wheat grains into the embryos  
321 and endosperms. The results in Fig. 2b suggest *TaYUC9-1* genes are expressed in both tissues  
322 with higher expression in embryos, whereas *TaYUC10* genes are only expressed in  
323 endosperm. Examination of the RNA-seq data from dissected tissue layers provides further

324 information on localisation of *TaYUC* gene expression. These data indicate that highest  
325 expression of *TaYUC9-1* occurs in the aleurone and transfer cells, whereas *TaYUC10* has the  
326 highest expression in the starchy endosperm. Nevertheless, expression of both genes appears  
327 to occur throughout the endosperm. No RNA-seq data is available on expression in wheat  
328 embryos of the Chinese Spring variety. However, data from the variety Azhurnaya (not  
329 shown) confirm our observations of expression of *TaYUC9-1* but not *TaYUC10* in this tissue.

330 Sequencing of the RT-PCR products was used to clarify which copy(s) of the  
331 *TaYUC9-1* and *TaYUC10* groups were active. These results indicated maximum expression  
332 of *TaYUC9-A1* or *TaYUC9-D1* and *TaYUC10-D* but suggested significant expression of the  
333 other genome copies of both genes. Taken with the RNA-seq data, it would appear that  
334 *TaYUC9-A1*, *TaYUC9-B*, *TaYUC9-D1*, *TaYUC10-A* and *TaYUC10-D* are all strongly up-  
335 regulated during grain fill.

### 336 **IAA production coincides with increases in grain weight and starch content** 337 **from 5 to 15 DAA**

338 To investigate the relationship between expression of *TaTAR2* and *TaYUC* genes and the  
339 auxin content of the developing grains, we measured IAA by combined liquid  
340 chromatography-tandem mass spectrometry in multiple reaction monitoring mode (LC-  
341 MS/MS MRM) with [<sup>13</sup>C] IAA as the internal standard in extracts of grains from 5 to 20  
342 DAA. As shown in Fig. 2c, the IAA content increased more than 30-fold during grain  
343 development with the largest increase occurring between 5 and 15 DAA. Figures 2d and 2e  
344 illustrate the grain fresh weight (FW) and starch content respectively, at the same  
345 developmental stages. Both parameters also increased maximally between 5 and 15 DAA,  
346 coinciding with the major increase of IAA in developing wheat grains.

## 347 **Discussion**

### 348 **Phylogenetic analysis of all *TAR* and *YUCCA* genes in wheat**

349 The *TAR*/*YUCCA* pathway has been demonstrated as the main route of IAA synthesis in  
350 plants (Mashiguchi et al. 2011; Won et al. 2011). *TAR* and *YUCCA* activity has also been  
351 reported as the major source of IAA in maize and rice cereal grains (Bernardi et al. 2012;  
352 Chourey et al. 2010; Nonhebel and Griffin 2020). However, there has been no comprehensive

353 study of these genes in wheat. Additionally, IAA is widely cited as a key signalling  
354 component during grain development. Thus, there is a need to understand its production in  
355 this important cereal crop. Finally, the frequently cited but anomalous work on the *TGW6*  
356 gene (Hu et al. 2016a; Ishimaru et al. 2013) in wheat and rice has effectively ignored this  
357 source of IAA in proposing that the activity of an IAA-glucose hydrolase can regulate the  
358 IAA content of grains.

359 Here, we present the first complete list and phylogenetic analysis of YUCCA  
360 genes/proteins in wheat. We have named these genes based on their homology to rice  
361 YUCCAs, rather than in comparison to Arabidopsis proteins (as was done with the previously  
362 named TaYUC10 group). YUCCA proteins are quite divergent and there are not  
363 unambiguous orthologous relationships between cereal YUCCAs and their homologues in  
364 dicots. On the other hand, most rice YUCCAs have conserved homologues in other grasses,  
365 with bootstrap values indicating high reliability of relationships (Russell French et al. 2014).  
366 It is therefore likely that the sub-functions of YUCCAs may be conserved within the cereals.  
367 The systematic naming of all genes in a family rather than *ad hoc* naming of individual genes  
368 is important to avoid future confusion. In naming genes, we have followed the convention in  
369 the Wheat Gene Catalogue of appending the genome label to each name. In line with this we  
370 have renamed the TaYUC10 group, previously described by Li et al. (2014) as *TaYUC10-B1*,  
371 *TaYUC10-A* and *TaYUC10-D* with the addition of *TaYUC10-B2*.

372 In clade I, each of the functional rice YUCCA sequences has at least one close  
373 homologue in wheat, suggesting conservation of function. Most (OsYUC1, OsYUC3,  
374 OsYUC4, OsYUC5 and OsYUC8) have a triplet of co-orthologous proteins. However,  
375 OsYUC7 has six co-orthologues in wheat suggesting a gene duplication event in a wheat  
376 progenitor. In clade II, the situation is more complex. Both OsYUC9 and OsYUC11 have  
377 close homologues in wheat, barley and Brachypodium. This is similar to maize and sorghum  
378 (*Sorghum bicolor*) (Russell French et al. 2014). However, the YUC9 group has duplicated in  
379 wheat and Brachypodium; the TaYUC9-1 group is most similar to OsYUC9 and its  
380 expression profile is also similar to the rice gene whereas the TaYUC9-2 group is more  
381 divergent. The TaYUC10 group appears to form a separate Pooideae branch that has undergone  
382 gene expansion, with multiple close homologues on separate chromosomes in wheat (4A, 5B,  
383 5D and 6B) and Brachypodium, as well as apparent tandem repeats in Brachypodium; barley



384 has 10 proteins in this group. The phylogeny of the group is somewhat ambiguous with low  
385 bootstrap values and different programmes (Maximum Likelihood versus Neighbour Joining)  
386 variously placing the group with OsYUC11 or OsYUC12. Careful pairwise comparison of  
387 the wheat sequences with both OsYUC11 and OsYUC12 supports the maximum likelihood  
388 tree shown, placing the group closest to OsYUC11 rather than OsYUC12 and OsYUC14.  
389 This is interesting, as one of us had previously noted OsYUC12 has orthologues in maize and  
390 sorghum with similar expression profiles (Russell French et al. 2014).

391 Our phylogenetic analysis of TAR proteins in wheat updates the previous study by  
392 Shao et al. (2017), with the addition of three new TaTAR2 proteins, TaTAR2.6-1Ba,  
393 TaTAR2.6-1Bb and TaTAR2.6-U. These new proteins, with TaTAR2.4-7A, TaTAR2.5-1A  
394 and TaTAR2.5-1B form a separate branch, with no orthologues in rice, barley or  
395 Brachypodium. This group of enzymes may have distinct sub-function in wheat.

### 396 **Expression of *TaTAR2.3-1B*, *TaYUC9-1* and *TaYUC10* correlates with** 397 **increasing IAA content during grain fill from 5 to 15 DAA**

398 Results from both qRT-PCR and analysis of RNA-seq data confirmed the observation of  
399 Shao et al. (2017) that *TaTAR2.3-1B* is the most highly expressed tryptophan  
400 aminotransferase in developing wheat grains. Strong up-regulation occurred during early  
401 grain fill between 5 and 15 DAA coinciding with a similar increase in IAA content of the  
402 grains over the same interval. This suggests that TaTAR2.3 is primarily responsible for  
403 catalysing the first step in IAA synthesis of developing grains. A similar increase in  
404 expression of orthologous genes *ZmTAR1* and *OsTAR1/OsFBL* in developing grains of maize  
405 and rice also coincides with the major increase in IAA content, indicating conservation of  
406 expression of this clade (Abu-Zaitoon et al. 2012; Chourey et al. 2010). In wheat, expression  
407 of *TaTAR2.3-1B* appears to be specific to the developing grains, with no expression  
408 detectable in other parts of the plant. This may represent additional subfunctionalisation due  
409 to the larger number of TAR genes in wheat compared to other cereals.

410 The expression of *TaTAR2.2-1A*, *TaTAR2.2-1D* and *TaTAR2.5-1B* at 2 DAA,  
411 followed by their rapid down-regulation suggests IAA produced during very early grain  
412 development is regulated separately from that during the grain fill period. This is similar to  
413 rice where *OsTAR2* appears to be the dominant gene expressed at 1 DAA, whereas *OsTAR1*

414 is expressed later (Abu-Zaitoon et al. 2012). The promotive effect of TAR and IAA for grain  
415 fill in wheat is supported by the positive effect on grain yield of *TaTAR2.1-3A* overexpression  
416 (Shao et al. 2017). In addition, a mutant of the orthologous gene, *tsg1*, has a negative effect  
417 on grain size in rice (Guo et al. 2019).

418 Wheat genes positioned with *OsYUC1-8* in clade I are mostly expressed in vegetative  
419 and/or floral tissues with little or no expression in grains. *OsYUC1-8* are also active in similar  
420 tissues of rice plants with low expression in grains (Abu-Zaitoon et al. 2012; Yamamoto et al.  
421 2007; Zhao et al. 2013). On the other hand, clade II genes *TaYUC9-A1*, *TaYUC9-B*, *TaYUC9-*  
422 *D1*, *TaYUC10-A* and *TaYUC10-D* are all highly expressed during grain fill. These results  
423 confirm data from Li et al. (2014) relating to *TaYUC10-D* (previously *TaYUC10.3*) but  
424 expression of *TaYUC9-A1*, *TaYUC9-B* or *TaYUC9-D1* during grain fill has not been  
425 described previously. The importance of clade II YUCCA for the production of IAA in cereal  
426 grains is demonstrated by similar data from maize and rice (Abu-Zaitoon et al. 2012;  
427 Chourey et al. 2010). Interestingly, *ZmYUC1* appears to be primarily responsible for IAA  
428 production in developing maize grains (Chourey et al. 2010), whereas three genes, *OsYUC9*,  
429 *OsYUC11* and *OsYUC12* are all up-regulated in rice grains. These rice genes have differences  
430 in their expression profiles, with earlier and more restricted up-regulation of *OsYUC12*  
431 (Nonhebel and Griffin 2020). A similar situation may occur in wheat; *TaYUC9-1* genes were  
432 maximally up-regulated between 10 and 15 DAA and remained active at 20 DAA, similar to  
433 the orthologous *OsYUC9* (Nonhebel and Griffin 2020). Expression of the *TaYUC9-1* group  
434 also increased in parallel with *TaTAR2.3-1B* and correlated most closely with the increasing  
435 IAA content of grains suggesting that these genes may be primarily responsible for IAA  
436 production during grain fill and similar again to the situation in rice. On the other hand,  
437 *TaYUC10* was up-regulated earlier than *TaYUC9-1* with a maximum increase between 5 and  
438 10 DAA, and a decline in expression at 20 DAA. This expression profile is similar to that of  
439 *OsYUC12* in rice. Although *TaYUC10* and *OsYUC12* are not directly orthologous, their  
440 expression profile distinct from that of *TaYUC9-1* suggests a requirement for very precise  
441 and localised IAA production regulated by separate genes during early grain fill, as suggested  
442 by Nonhebel and Griffin (2020).



#### 443 **Localisation of IAA production at 15 DAA in developing wheat grains**

444 IAA production occurs mostly in endosperm of rice (Abu-Zaitoon et al. 2012; Russell French  
445 et al. 2014) and maize (Bernardi et al. 2019; Chourey et al. 2010). Forestan et al. (2010)  
446 observed high expression of the auxin transporter gene *ZmPIN1* in the periphery of maize  
447 endosperm and the embryo surrounding region. Furthermore, treatment with the auxin  
448 transport inhibitor, naphthylphthalamic acid (NPA) during early embryogenesis caused  
449 developmental abnormalities in the maize embryo. It is widely assumed, therefore, that the  
450 endosperm is the major source of IAA for the early embryo. Our results for wheat indicate  
451 that *TaTAR2.3-1B* and the *TaYUC10* group are similarly expressed only in wheat endosperm.  
452 However, we found high expression of *TaYUC9-1* in the embryo at 15 DAA, with lower  
453 expression in the endosperm. As this result was novel, the experiment was carefully checked  
454 and repeated. The observation was also confirmed by RNA-seq data from a different variety  
455 of wheat. It is probable therefore, that the embryo is only dependent on IAA imported from  
456 the endosperm at the very early stages of development.

457 Several reports suggest IAA may be important in aleurone layer and transfer cell  
458 development and crucial for nutrient uptake into the grains. Forestan et al. (2010) showed  
459 high immunolocalisation signal of IAA in the aleurone of maize kernels and use of NPA  
460 interfered with normal development of the aleurone. Recent work by Bernardi et al. (2019)  
461 suggests IAA has a role in the formation of the basal endosperm transfer cell layer (BETL) in  
462 maize. This is supported by the poor grain fill of auxin-deficient *de18* and *dek18* mutants of  
463 maize (Bernardi et al. 2012; Bernardi et al. 2016). Interestingly, *TaYUC-9.1* genes are most  
464 highly expressed in the transfer cells and aleurone layer of wheat grains, with lower  
465 expression in the starchy endosperm. This indicates the importance of IAA in these key cell  
466 layers is conserved between cereals and warrants further direct investigation.

#### 467 **IAA production by TAR/YUCCA versus grain weight genes *TaTGW6* and** 468 ***TaTGW-7A***

469 Our results have demonstrated high activity of the TAR/YUCCA pathway for IAA  
470 biosynthesis in developing wheat grains, coinciding with a large increase in the IAA content  
471 of grains. As in maize and rice, IAA in wheat grains accumulates particularly during early  
472 grain fill and coincides with the initiation of starch production. In other seeds, it has been

473 proposed to initiate the differentiation of endosperm transfer cells and starch production  
474 (Bernardi et al. 2019; McAdam et al. 2017; Nonhebel and Griffin 2020). On the other hand, a  
475 negative effect of IAA on grain fill has been reported in publications relating to the *TGW6*  
476 genes in rice (Ishimaru et al. 2013) and wheat (Hu et al. 2016a), and *TaTGW-7A* in wheat (Hu  
477 et al. 2016b). Although our study did not investigate the function of these genes, it does raise  
478 some important questions. Most obviously, it is unclear how an inactive IAA glucose-  
479 hydrolase gene could have a major effect on the IAA content of grains when the  
480 TAR/YUCCA pathway is strongly up-regulated. Although no mutants of these *TaTAR2.3*,  
481 *TaYUC9-1* and *TaYUC10* are available in wheat to verify that they regulate IAA content,  
482 defective kernel mutants of maize with reduced *ZmYUC1* activity demonstrate the  
483 importance of this pathway in cereal grain fill. Further, it is clear that there are strong  
484 similarities between IAA production in rice, maize and wheat as discussed earlier.

485         In addition, data on the IAA content of wheat grains with different alleles of *TaTGW6*  
486 and *TaTGW-7A* do not provide strong support for their role in IAA production either.  
487 Measurements of the IAA content of grains reported by Hu et al. (2016a) used an HPLC  
488 system with a UV absorbance detector set to 250 nm. This is an inadequate method for  
489 determining hormone contents, lacking both sufficient specificity to be sure it is measuring  
490 the correct compound as well as internal standard required to account for loss of analyte  
491 during sample work-up. In addition, the amounts of IAA found at 20 DAA, the stage at which  
492 maximum effect of the inactive genes is reported to occur, were widely variable. Values of  
493 IAA content reported in wheat varieties with the active *TaTGW6-a* allele varied from 1300–  
494 4700 ng/g FW compared to about 800–1200 ng/g FW in varieties with the inactive or less  
495 active b and c alleles (values estimated from graphs in Hu et al. (2016a)). Similar variation  
496 was reported in the *TaTGW-7A* paper (Hu et al. 2016b). Large variation was also seen in the  
497 mean grain size from wheat varieties with active alleles of both *TaTGW6* and *TaTGW-7A*;  
498 this variation bears no relation to the IAA content. Finally, it is worth noting that neither gene  
499 in wheat has been experimentally characterised. *TaTGW6* is assumed to hydrolyse IAA-  
500 glucose based on a report on the rice gene product (Ishimaru et al. 2013). Although the  
501 authors refer to *TaTGW-7A* as an “IGPS-like gene” its product is not actually a homologue of  
502 IGPS in other plants. In fact, the authors merely state that “the deduced amino acid sequences  
503 showed the presence of highly conserved TIM-br\_sig\_trns and UPF0261 functional domains,  
504 forming a TIM barrel fold structure, the same as IGPS”. IGPS is an essential enzyme required

505 for tryptophan synthesis; the wheat proteome has three sequences (encoded by  
506 TraesCS2A02G335200, TraesCS2D02G329500, TraesCS2B02G348500) with between 54%  
507 and 56% amino acid identity to the experimentally characterised Arabidopsis IGPS (Li et al.  
508 1995). These genes are expressed in the wheat plant including grains for the purpose of  
509 tryptophan production. None of these wheat sequences nor the Arabidopsis IGPS encoded by  
510 AT2G04400 has significant homology to *TaTGW-7A*, which is very unlikely to be an indole-  
511 3-glycerol phosphate synthase.

## 512 **Conclusion**

513 In this study, we have demonstrated that auxin biosynthesis genes *TaTAR2.3-1B*, *TaYUC9-*  
514 *A1*, *TaYUC9-B*, *TaYUC9-D1*, *TaYUC10-A* and *TaYUC10-D* are highly active in wheat grains  
515 from 10 to 20 DAA. Their expression correlates positively with IAA levels, grain weight and  
516 starch synthesis during major grain fill period in wheat. The gene expression data combined  
517 with accurate measurements of grain IAA content from 5 to 20 DAA suggests the  
518 TAR/YUCCA pathway is a major source of auxin in developing wheat grains. This raises  
519 serious questions about how a mutation in *TGW6*, encoding a putative IAA-glucose hydrolase  
520 could have the reported effects on grain IAA content. Our data on localisation of auxin  
521 biosynthesis gene expression confirm that IAA is produced in wheat endosperm as in other  
522 cereals. In addition, the novel finding of *TaYUC9-1* activity in embryos at 15 DAA suggests  
523 that embryos have their own source of IAA by this stage of development. Differences in the  
524 expression profiles of *TaYUC9-1* and *TaYUC10* groups suggest some sub-functionalisation.  
525 The expression of *TaYUC9-1* genes in aleurone and transfer cells corroborates the suggestion  
526 by Bernardi et al. (2019) that IAA may be involved in differentiation of these cells in maize.  
527 This may partly explain the importance of IAA for grain fill.

## References

- Abu-Zaitoon YM, Bennett K, Normanly J, Nonhebel HM (2012) A large increase in IAA during development of rice grains correlates with the expression of tryptophan aminotransferase *OsTAR1* and a grain-specific *YUCCA*. *Physiologia Plant* 146:487–499
- Barkawi LS, Tam YY, Tillman JA, Pederson B, Calio J, Al-Amier H, Emerick M, Normanly J, Cohen JD (2008) A high-throughput method for the quantitative analysis of indole-3-acetic acid and other auxins from plant tissue. *Anal Biochem* 372:177–188
- Bernardi J, Battaglia R, Bagnaresi P, Lucini L, Marocco A (2019) Transcriptomic and metabolomic analysis of *ZmYUC1* mutant reveals the role of auxin during early endosperm formation in maize. *Plant Sci* 281:133–145
- Bernardi J, Lanubile A, Li Q-B, Kumar D, Kladnik A, Cook SD, Ross JJ, Marocco A, Chourey PS (2012) Impaired auxin biosynthesis in the *defective endosperm18* mutant is due to mutational loss of expression in the *ZmYucl* gene encoding endosperm-specific YUCCA1 protein in maize. *Plant Physiol* 160:1318–1328
- Bernardi J, Li QB, Gao Y, Zhao Y, Battaglia R, Marocco A, Chourey PS (2016) The auxin-deficient *defective kernel18 (dek18)* mutation alters the expression of seed-specific biosynthetic genes in maize. *J Plant Growth Regul* 35:770–777
- Borrill P, Ramirez-Gonzalez R, Uauy C (2016) expVIP: a customizable RNA-seq data analysis and visualization platform. *Plant Physiol* 170:2172–2186
- Chen KH, Miller AN, Patterson GW, Cohen JD (1988) A rapid and simple procedure for purification of indole-3-acetic acid prior to GC-SIM-MS analysis. *Plant Physiol* 86:822–825
- Chourey PS, Li Q-B, Kumar D (2010) Sugar–hormone cross-talk in seed development: two redundant pathways of IAA biosynthesis are regulated differentially in the invertase-deficient miniature1 (*mn1*) seed mutant in maize. *Mol Plant* 3:1026–1036
- Edgar RC (2004) MUSCLE: multiple sequence alignment with high accuracy and high throughput. *Nucleic Acids Res* 32:1792–1797
- FAOSTAT (2020) Food and Agriculture Organisation of the UN (FAO) statistics database: production, trade, supply. <http://www.fao.org/faostat/en/#data/QC>
- Felsenstein J (1985) Confidence limits on phylogenies: An approach using the bootstrap. *Evolution* 39:783–791
- Forestan C, Meda S, Varotto S (2010) *ZmPIN1*-mediated auxin transport is related to cellular differentiation during maize embryogenesis and endosperm development. *Plant Physiol* 152:1373–1390

- Foulkes MJ, Slafer GA, Davies WJ, Berry PM, Sylvester-Bradley R, Martre P, Calderini DF, Griffiths S, Reynolds MP (2011) Raising yield potential of wheat. III. Optimizing partitioning to grain while maintaining lodging resistance. *J Exp Bot* 62:469–486
- Guo T, Chen K, Dong NQ, Ye WW, Shan JX, Lin HX (2019) *Tillering and small grain 1* dominates the tryptophan aminotransferase family required for local auxin biosynthesis in rice. *J Integr Plant Biol* 62:581–600
- Hu MJ, Zhang HP, Cao JJ, Zhu XF, Wang SX, Jiang H, Wu ZY, Lu J, Cheng C, Sun GL, Ma CX (2016a) Characterization of an IAA-glucose hydrolase gene *TaTGW6* associated with grain weight in common wheat (*Triticum aestivum* L.). *Mol Breed* 36:1–11
- Hu MJ, Zhang HP, Liu K, Cao JJ, Wang SX, Jiang H, Wu ZY, Lu J, Zhu XF, Xia XC, Sun GL, Ma CX, Chang C (2016b) Cloning and characterization of *TaTGW-7A* gene associated with grain weight in wheat via SLAF-seq-BSA. *Front Plant Sci* 7:1902
- Ishimaru K, Hirotsu N, Madoka Y, Murakami N, Hara N, Onodera H, Kashiwagi T, Ujiie K, Shimizu B, Onishi A, Miyagawa H, Katoh E (2013) Loss of function of the IAA-glucose hydrolase gene *TGW6* enhances rice grain weight and increases yield. *Nature Genet* 45:707–711
- Jones DT, Taylor WR, Thornton JM (1992) The rapid generation of mutation data matrices from protein sequences. *Bioinformatics* 8:275–282
- Kersey PJ, Allen JE, Armean I, Boddu S, Bolt BJ, Carvalho-Silva D, Christensen M, Davis P, Falin LJ, Grabmueller C, Humphrey J, Kerhornou A, Khobova J, Aranganathan NK, Langridge N, Lowy E, McDowall MD, Maheswari U, Nuhn M, Ong CK, Overduin B, Paulini M, Pedro H, Perry E, Spudich G, Tapanari E, Walts B, Williams G, Tello-Ruiz M, Stein J, Wei S, Ware D, Bolser DM, Howe KL, Kulesha E, Lawson D, Maslen G, Staines DM (2015) Ensembl Genomes 2016: more genomes, more complexity. *Nucleic Acids Res* 44:D574–D580
- Kumar S, Stecher G, Tamura K (2016) MEGA7: Molecular Evolutionary Genetics Analysis version 7.0 for bigger datasets. *Mol Biol Evol* 33:1870–1874
- Li N, Yin N, Niu Z, Hui W, Song J, Huang C, Wang H, Kong L, Feng D (2014) Isolation and characterization of three *TaYUC10* genes from wheat. *Gene* 546:187–194
- Li J, Chen S, Zhu L, Last RL (1995) Isolation of cDNAs encoding the tryptophan pathway enzyme indole-3-glycerol phosphate synthase from *Arabidopsis thaliana*. *Plant Physiol* 108:877–878
- Mashiguchi K, Tanaka K, Sakai T, Sugawara S, Kawaide H, Natsume M, Hanada A, Yaeno T, Shirasu K, Yao H, McSteen P, Zhao Y, Hayashi KI, Kamiya Y and Kasahara H (2011) The main auxin biosynthesis pathway in Arabidopsis. *Proc Natl Acad Sci* 108:18512–18517
- McAdam EL, Meitzel T, Quittenden LJ, Davidson SE, Dalmais M, Bendahmane AI, Thompson R, Smith JJ, Nichols DS, Urquhart S, Gelinas-Marion A, Aubert G, Ross

- JJ (2017) Evidence that auxin is required for normal seed size and starch synthesis in pea. *New Phytol* 216:193–204
- Nolan T, Hands RE, Bustin SA (2006) Quantification of mRNA using real-time RT-PCR. *Nat Protoc* 1:1559–1582
- Nonhebel HM, Griffin K (2020) Production and roles of IAA and ABA during development of superior and inferior rice grains. *Funct Plant Biol* 47:716–726
- Paolacci AR, Tanzarella OA, Porceddu E, Ciaffi M (2009) Identification and validation of reference genes for quantitative RT-PCR normalization in wheat. *BMC Mol Biol* 10:11
- Pfeifer M, Kugler KG, SandveSR, Zhan B, Rudu H, Hvidsten TR, Mayer KFX, Olsen OA, et al. (2014) International Wheat Genome Sequencing Consortium. Genome interplay in the grain transcriptome of hexaploid bread wheat. *Science* 345:1250091
- Ramírez-González RH, Borrill P, Land D, Harrington SA, Brinton J, Venturini L, Davey M, Jacobs J, Van Ex F, Pasha A, Khedikar Y, Robinson SJ, Cory AT, Florio T, Concia L, Juery C, Schoonbeek H, Steuernagel B, Xiang D, Ridout CJ, Chalhoub B, Mayer KFX, Benhamed M, Latrasse D, Bendahmane A, Wulff BBH, Appels R, Tiwari V, Datla R, Choulet F, Pozniak CJ, Provart NJ, Sharpe AG, Paux E, Spannagl M, Bräutigam A, Uauy C (2018) The transcriptional landscape of polyploid wheat. *Science* 361:eaar6089
- Rhee SY, Beavis W, Berardini TZ, Chen G, Dixon D, Doyle A, Garcia-Hernandez M, Huala E, Lander G, Montoya M, Miller N, Mueller LA, Mundodi S, Reiser L, Tacklind J, Weems DC, Wu Y, Xu I, Yoo D, Yoon J, Zhang P (2003) The Arabidopsis Information Resource (TAIR): a model organism database providing a centralized, curated gateway to Arabidopsis biology, research materials and community. *Nucleic Acids Res* 31:224–228.
- Russell French S, Abu-Zaitoon Y, Uddin M, Bennett K, Nonhebel H (2014) Auxin and cell wall invertase related signaling during rice grain development. *Plants* 3:95-112
- Shao A, Ma W, Zhao X, Hu M, He X, Teng W, Li H, Tong Y (2017) The auxin biosynthetic *TRYPTOPHAN AMINOTRANSFERASE RELATED TaTAR2.1-3A* increases wheat grain yield. *Plant Physiol* 174:2274–2288
- Tuan PA, Yamasaki Y, Kanno Y, Seo M, Ayele BT (2019) Transcriptomics of cytokinin and auxin metabolism and signaling genes during seed maturation in dormant and non-dormant wheat genotypes. *Sci Rep* 9:3983
- Won C, Shen X, Mashiguchi K, Zheng Z, Dai X, Cheng Y, Kasahara H, Kamiya Y, Chory J, Zhao Y (2011) Conversion of tryptophan to indole-3-acetic acid by TRYPTOPHAN AMINOTRANSFERASES OF ARABIDOPSIS and YUCCAs in Arabidopsis. *Proc Natl Acad Sci* 108:18518–18523

- Wu D, Dong J, Yao Y, Zhao W, Gao X (2015) Identification and evaluation of endogenous control genes for use in quantitative RT-PCR during wheat (*Triticum aestivum* L.) grain filling. *Genet Mol Res* 14:10530–10542
- Yamamoto Y, Kamiya N, Morinaka Y, Matsuoka M, Sazuka T (2007) Auxin biosynthesis by the *YUCCA* genes in rice. *Plant Physiol* 143:1362–1371
- Zhao D, MacKown CT, Starks PJ, Kindiger BK (2010) Rapid analysis of nonstructural carbohydrate components in grass forage using microplate enzymatic assays. *Crop Sci* 50:1537–1545
- Zhao Z, Zhang Y, Liu X, Zhang X, Liu S, Yu X, Ren Y, Zheng X, Zhou K, Jiang L, Guo X, Gai Y, Wu C, Zhai H, Wang H, Wan J (2013) A role for a dioxygenase in auxin metabolism and reproductive development in rice. *Dev Cell* 27:113–122
- Zuckerlandl E, Pauling L (1965) Evolutionary divergence and convergence in proteins. In: Bryson V, Vogel HJ (eds) *Evolving genes and proteins*. Academic Press, New York, pp 97–166



**Table 1** List of *TaTAR* genes in the wheat genome

| Gene Name                  | Gene ID (IWGSC RefSeq v1.1) | Chromosome |
|----------------------------|-----------------------------|------------|
| <i>TaTAR2.1-3A</i>         | TraesCS3A02G093000          | 3A         |
| <i>TaTAR2.1-3B</i>         | TraesCS3B02G108200          | 3B         |
| <i>TaTAR2.1-3D</i>         | TraesCS3D02G093300          | 3D         |
| <i>TaTAR2.2-1A</i>         | TraesCS1A02G233800          | 1A         |
| <i>TaTAR2.2-1B</i>         | TraesCS1B02G249600          | 1B         |
| <i>TaTAR2.2-1D</i>         | TraesCS1D02G238100          | 1D         |
| <i>TaTAR2.3-1A</i>         | TraesCS1A02G113400          | 1A         |
| <i>TaTAR2.3-1B</i>         | TraesCS1B02G133500          | 1B         |
| <i>TaTAR2.3-1D</i>         | TraesCS1D02G114800          | 1D         |
| <i>TaTAR2.4-7A</i>         | TraesCS7A02G179400          | 7A         |
| <i>TaTAR2.5-1A</i>         | TraesCS1A02G113600          | 1A         |
| <b><i>TaTAR2.5-1B</i></b>  | TraesCS1B02G133900          | 1B         |
| <b><i>TaTAR2.6-1Ba</i></b> | TraesCS1B02G004300          | 1B         |
| <b><i>TaTAR2.6-1Bb</i></b> | TraesCS1B02G004400          | 1B         |
| <i>TaTAR2.6-U</i>          | TraesCSU02G199800           | U          |
| <i>TaTAR3.1-3A</i>         | TraesCS3A02G244700          | 3A         |
| <i>TaTAR3.1-3B</i>         | TraesCS3B02G275200          | 3B         |
| <i>TaTAR3.1-3D</i>         | TraesCS3D02G246700          | 3D         |

U-unknown. The bold gene IDs are three newly reported genes



**Table 2** List of *TaYUC* genes in the wheat genome

| Gene Name                | Gene ID (IWGSC RefSeq v1.1) | Chromosome |
|--------------------------|-----------------------------|------------|
| <i>TaYUC1-A</i>          | TraesCS3A02G232600          | 3A         |
| <i>TaYUC1-B</i>          | TraesCS3B02G261900          | 3B         |
| <i>TaYUC1-D</i>          | TraesCS3D02G220500          | 3D         |
| <i>TaYUC3-A</i>          | TraesCS3A02G280900          | 3A         |
| <i>TaYUC3-B</i>          | TraesCS3B02G314700          | 3B         |
| <i>TaYUC3-D</i>          | TraesCS3D02G280900          | 3D         |
| <i>TaYUC4-A</i>          | TraesCS3A02G149500          | 3A         |
| <i>TaYUC4-B</i>          | TraesCS3B02G176800          | 3B         |
| <i>TaYUC4-D</i>          | TraesCS3D02G157600          | 3D         |
| <i>TaYUC5-A</i>          | TraesCS5A02G102700          | 5A         |
| <i>TaYUC5-B</i>          | TraesCS5B02G107000          | 5B         |
| <i>TaYUC5-D</i>          | TraesCS5D02G114500          | 5D         |
| <i>TaYUC6-A</i>          | TraesCS4A02G313200          | 4A         |
| <i>TaYUC6-B</i>          | TraesCS5B02G566700          | 5B         |
| <i>TaYUC7-A1</i>         | TraesCS2A02G011500          | 2A         |
| <i>TaYUC7-B1</i>         | TraesCS2B02G010100          | 2B         |
| <i>TaYUC7-D1</i>         | TraesCS2D02G012100          | 2D         |
| <i>TaYUC7-A2</i>         | TraesCS2A02G533200          | 2A         |
| <i>TaYUC7-B2</i>         | TraesCS2B02G562800          | 2B         |
| <i>TaYUC7-D2</i>         | TraesCS2D02G535100          | 2D         |
| <i>TaYUC8-A</i>          | TraesCS4A02G027500          | 4A         |
| <i>TaYUC8-B</i>          | TraesCS4B02G278300          | 4B         |
| <i>TaYUC8-D</i>          | TraesCS4D02G276600          | 4D         |
| <i>TaYUC9-A1</i>         | TraesCS5A02G217200          | 5A         |
| <i>TaYUC9-B</i>          | TraesCS5B02G216000          | 5B         |
| <i>TaYUC9-D1</i>         | TraesCS5D02G225200          | 5D         |
| <i>TaYUC9-A2</i>         | TraesCS7A02G065600          | 7A         |
| <i>TaYUC9-D2</i>         | TraesCS7D02G060000          | 7D         |
| <b><i>TaYUC10-A</i></b>  | TraesCS4A02G325400          | 4A         |
| <b><i>TaYUC10-B1</i></b> | TraesCS5B02G538300          | 5B         |
| <i>TaYUC10-B2</i>        | TraesCS6B02G033700          | 6B         |
| <b><i>TaYUC10-D</i></b>  | TraesCS5D02G556600          | 5D         |
| <i>TaYUC11-A1</i>        | TraesCS4A02G373500          | 4A         |
| <i>TaYUC11-A2</i>        | TraesCS7A02G075400          | 7A         |
| <i>TaYUC11-D</i>         | TraesCS7D02G070900          | 7D         |

Genes have been numbered by homology to rice genes. Genes in bold were previously reported as *TaYUC10.2*, *TaYUC10.1* and *TaYUC10.3*, respectively by Li et al. (2014).

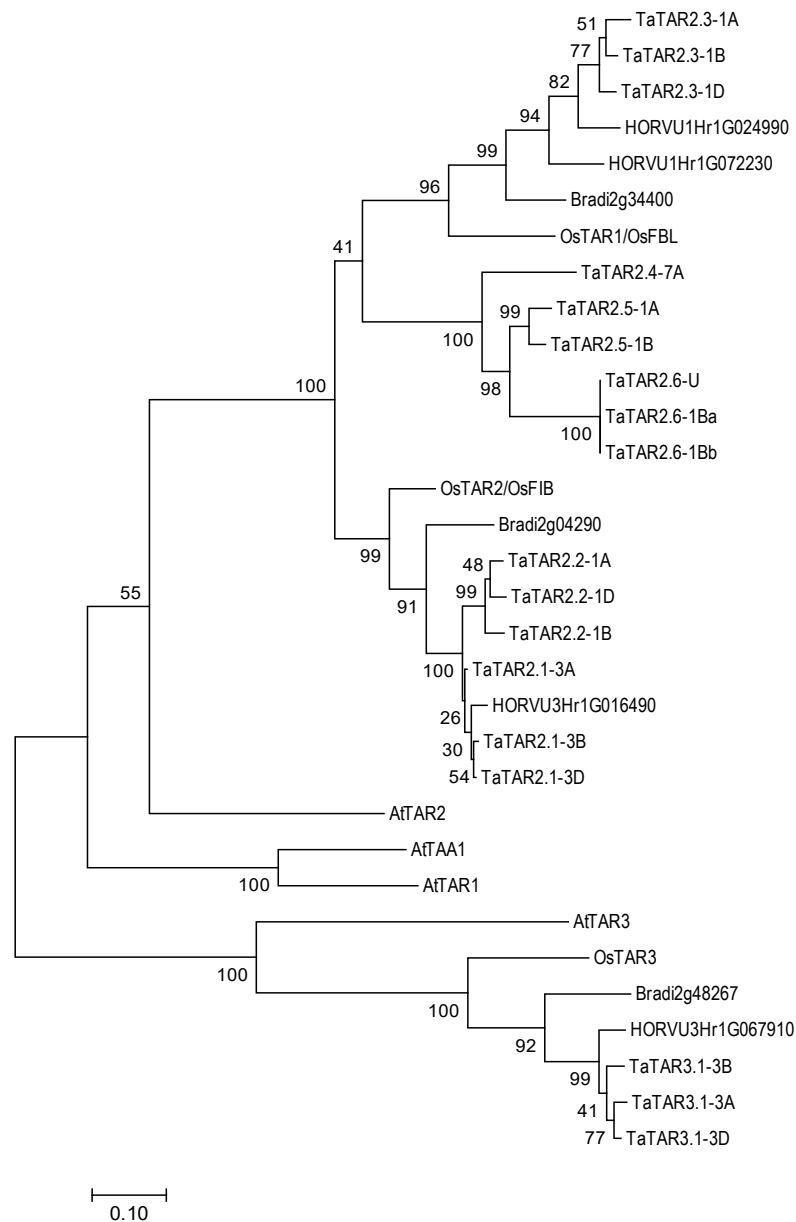

**Fig. 1** Phylogenetic tree showing relationships between TAR proteins from *Triticum aestivum* (TaTAR), *Oryza sativa* (OsTAR), *Brachypodium distachyon* (Brad), *Hordeum vulgare* (HORVU) and *Arabidopsis thaliana* (At). The tree was constructed in MEGA7.0.26 (Kumar et al., 2016) using Maximum Likelihood method (Jones et al., 1992). Multiple sequence alignment was performed by MUSCLE (Edgar, 2004). Bootstrap confidence levels were obtained using 500 replicates (Felsenstein, 1985). Evolutionary distances were computed using Poisson correction method (Zuckerandl and Pauling, 1965). Scale bar=0.10 amino acid substitutions per site

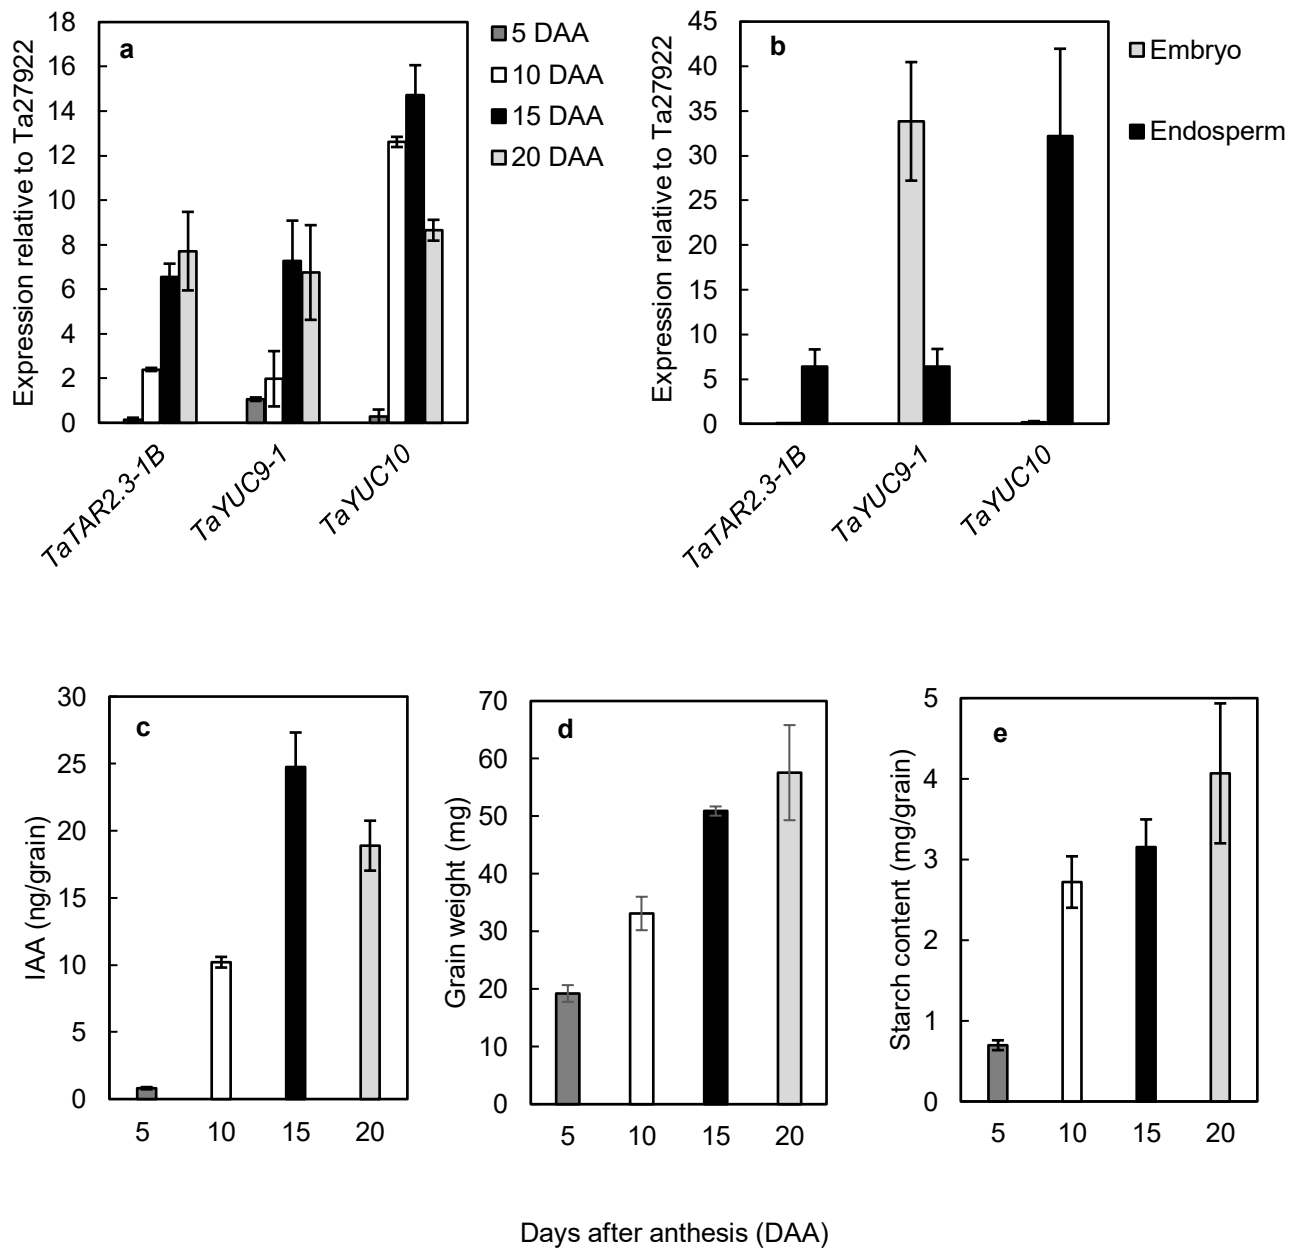

**Fig. 2** Quantitative RT-PCR analysis of relative transcript abundance for TaTAR2.3, TaYUC9-1 and TaYUC10 during grain development, whole grains (a), in dissected embryos and endosperms at 15 DAA (b), IAA content in ng per grain measured by LC-MS/MS MRM with [<sup>13</sup>C] IAA as the internal standard (c), grain fresh weight (d) and starch content (e). Expression relative to reference gene Ta27922 is shown, expression relative to the second reference gene Ta53964 showed the same trend. All data points represent the mean of three biological replicates ± the standard error of the means

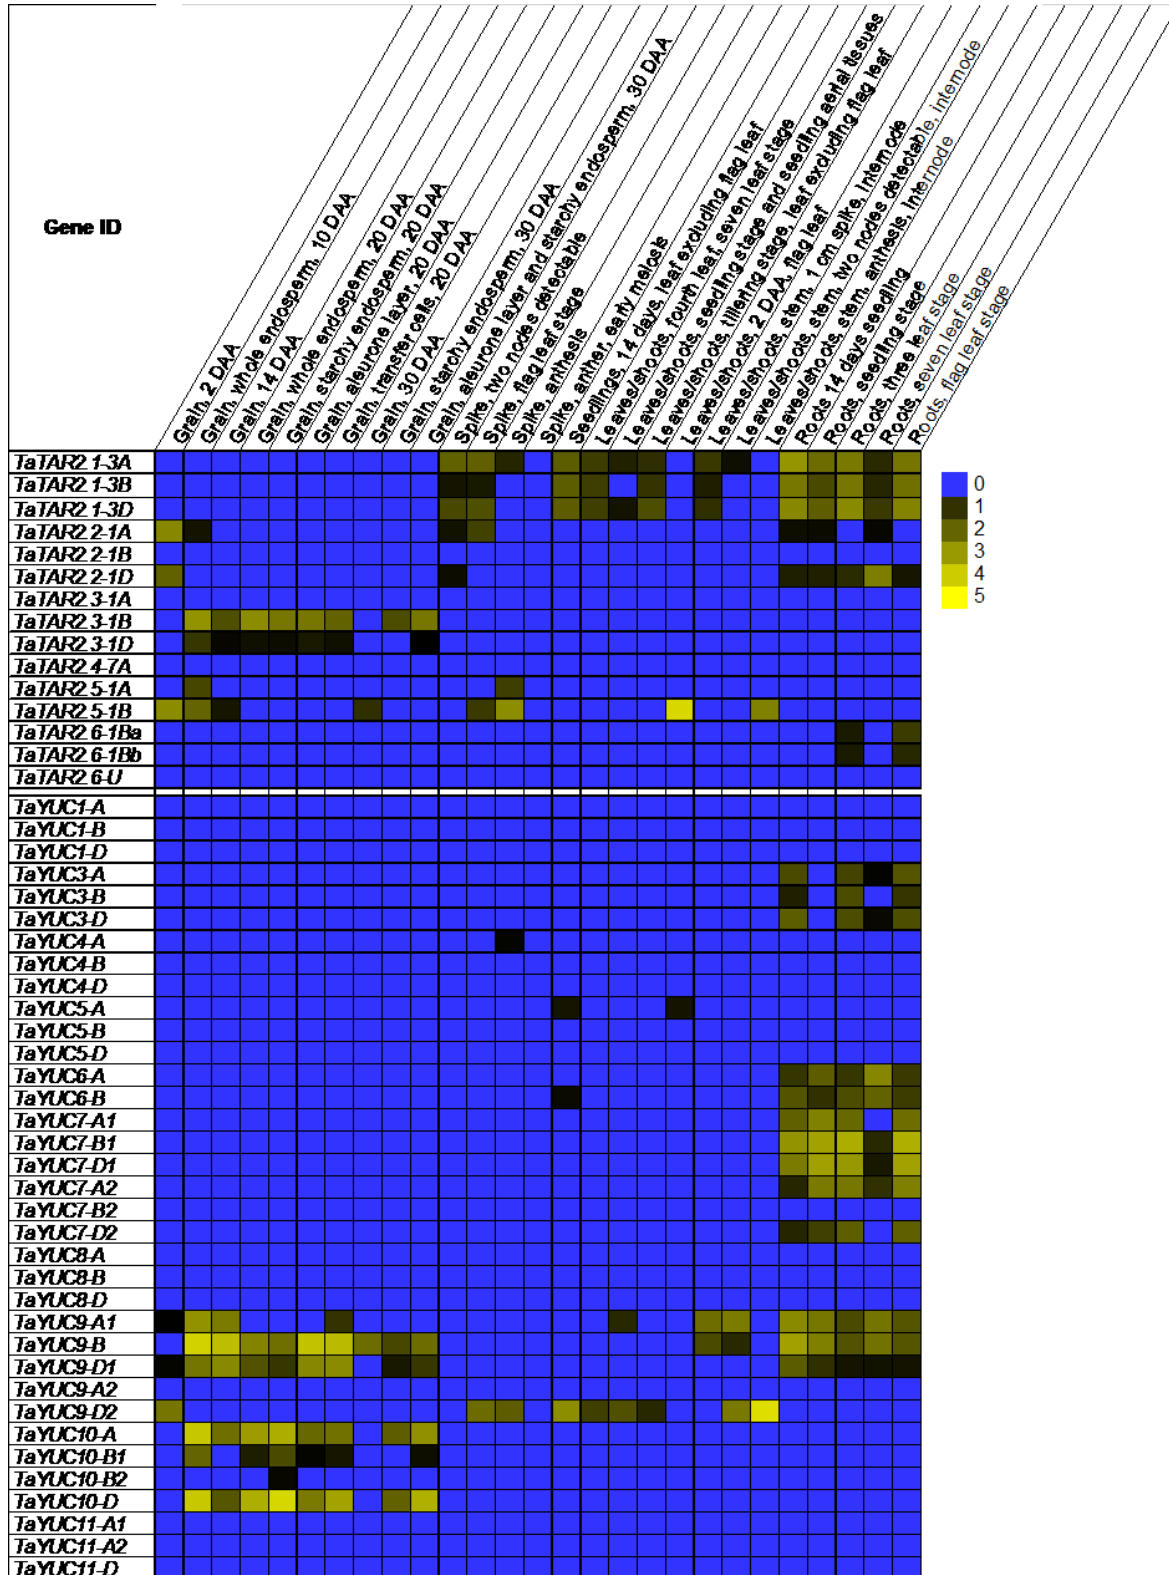

**Fig. 3** Heat map depicting expression of *TaTAR2* and *TaYUC* genes from RNA-seq data in expVIP. Data were taken from different studies using the Chinese Spring variety. The relative expression values are normalized as tpm (transcripts per million)

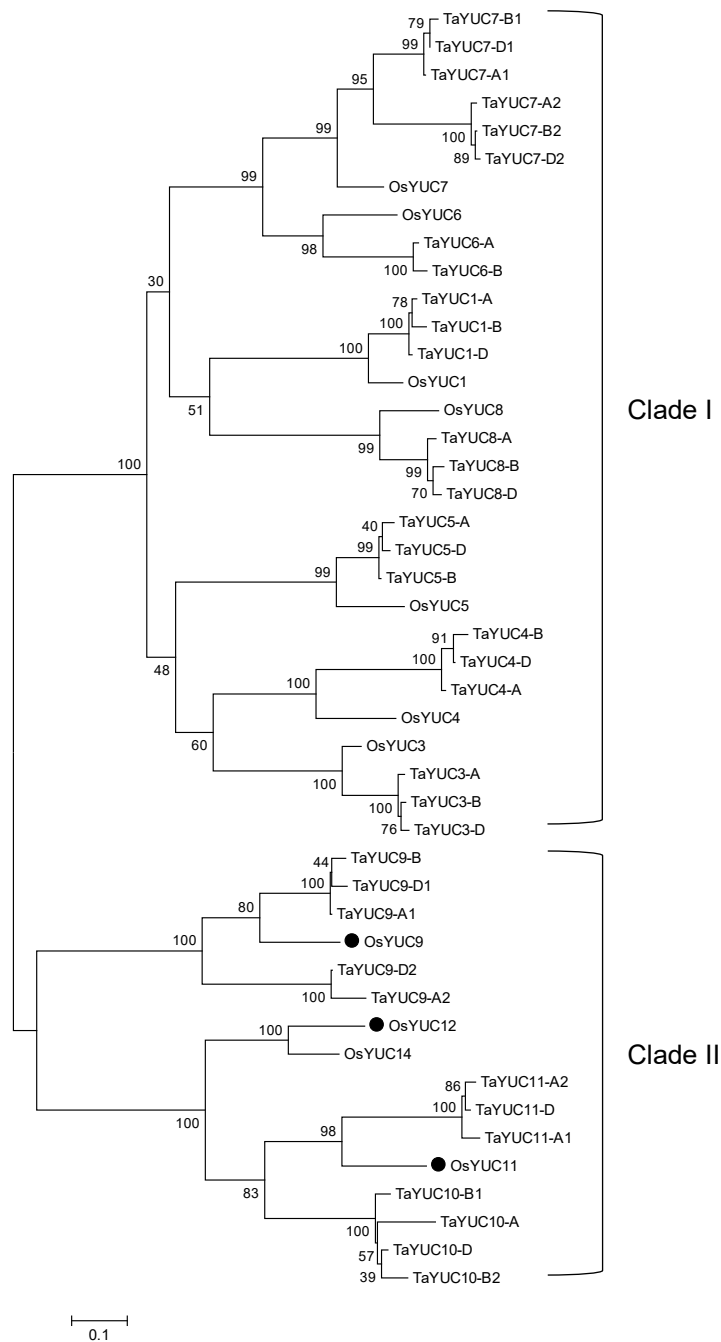

**Fig. 4** Phylogenetic tree showing relationships between YUCCA proteins from *Triticum aestivum* (TaYUC) and *Oryza sativa* (OsYUC). The tree was constructed in MEGA7.0.26 (Kumar et al. 2016) using Maximum Likelihood method (Jones et al. 1992). Multiple sequence alignment was performed by MUSCLE (Edgar 2004). Bootstrap confidence levels were obtained using 500 replicates (Felsenstein 1985). Evolutionary distances were computed using Poisson correction method (Zuckerandl and Pauling 1965). Scale bar=0.10, amino acid substitutions per site. Black dots are encoded by genes expressed in rice grains
